# Supplementary material for: HERA: a high-resolution pan-European hydrological reanalysis (1950–2020)
Source: Copernicus journal article supplement (doi:10.5194/essd-2024-41), 2024-02-19
Supplement: Supplementary file 1 [file essd-2024-41-supplement.pdf]

# Supplement of: HERA: a high-resolution pan-European hydrological reanalysis (1950-2020)

Tilloy et al. (2024)

Corresponding to Alois Tilloy (alois.tilloy@ec.europa.eu)

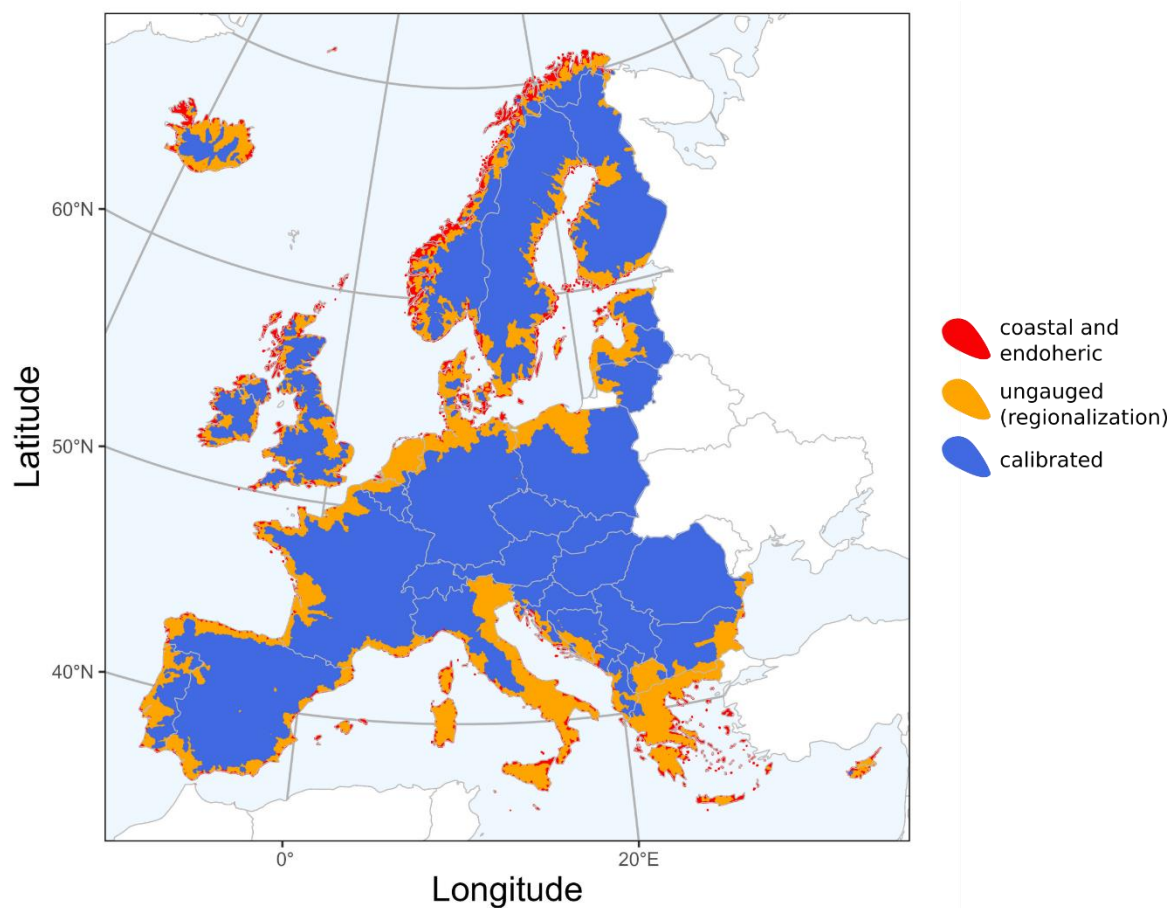

**Figure S1: HERA domain with spatial distribution of catchments with calibrated (blue, 69.6% of domain area), regionalized (orange, 23.9% of domain area) and default (red, 6.5% of domain area) parameters.**

**Table S1: LISFLOOD calibration parameter for EFAS-5 (for more details, refer to CEMS-Flood online documentation, 2023)**

| <b>Parameter name</b>        | <b>Description</b>                                                                                                                                       | <b>Default value</b> | <b>Parameter range</b> |
|------------------------------|----------------------------------------------------------------------------------------------------------------------------------------------------------|----------------------|------------------------|
| <i>SnowMeltCoef</i>          | Snow melt rate in degree day model equation [mm/(C day)]                                                                                                 | 4                    | [2.5 – 6.5]            |
| <i>b_Xinanjiang</i>          | Exponent in Xinanjiang equation for infiltration capacity of the soil [-]                                                                                | 0.5                  | [0.01 – 5]             |
| <i>PowerPrefFlow</i>         | Exponent in the empirical function describing the preferential flow (i.e. flow that bypasses the soil matrix and drains directly to the groundwater) [-] | 4                    | [0.5 – 8]              |
| <i>UpperZoneTimeConstant</i> | Time constant for upper groundwater zone [days]                                                                                                          | 10                   | [0.01 – 40]            |
| <i>GwPercValue</i>           | Maximum percolation rate from upper to lower groundwater zone [mm/day]                                                                                   | 0.8                  | [0.01 – 2]             |
| <i>LowerZoneTimeConstant</i> | Time constant for lower groundwater zone [days]                                                                                                          | 100                  | [40 – 500]             |
| <i>LZThreshold</i>           | Threshold to stop outflow from lower groundwater zone to the channel [mm]                                                                                | 10                   | [0 – 30]               |
| <i>GwLoss</i>                | Maximum loss rate out of lower groundwater zone expressed as a fraction of lower zone outflow [-]                                                        | 0                    | [0 – 1]                |
| <i>QSplitMult</i>            | Multiplier to adjust discharge triggering floodplains flow [-]                                                                                           | 2                    | [0 – 20]               |
| <i>CalChanMan1</i>           | Multiplier for channel Manning's coefficient n for riverbed [-]                                                                                          | 1                    | [0.5 – 2]              |
| <i>CalChanMan2</i>           | Multiplier for channel Manning's coefficient n for floodplains [-]                                                                                       | 1                    | [0.5 – 5]              |
| <i>adjust_Normal_Flood</i>   | Multiplier to adjust reservoir normal filling (balance between lower and upper limit of reservoir filling). [-]                                          | 0.8                  | [0.01 – 0.99]          |
| <i>ReservoirRnormqMult</i>   | Multiplier to adjust normal reservoir outflow [-]                                                                                                        | 1                    | [0.25 – 2]             |
| <i>LakeMultiplier</i>        | Multiplier to adjust lake outflow [-]                                                                                                                    | 1                    | [0.5 – 2]              |

**Table S2: Surface fields maps used as input to the LISFLOOD model to general the hydrological reanalysis. HERA refers to the HERA dataset while LF-EU maps refers to the LISFLOOD static and parameter maps for Europe (2024) dataset. More information on main data source is provided in Table S3.**

| Surface field name                                  | Description                                                                                                                                                    | Main data source           | Data location |
|-----------------------------------------------------|----------------------------------------------------------------------------------------------------------------------------------------------------------------|----------------------------|---------------|
| <i>Morphology and river network</i>                 |                                                                                                                                                                |                            |               |
| <i>Mask area</i>                                    | Boolean map defining model boundaries                                                                                                                          |                            | HERA          |
| <i>Local drainage direction (LDD)</i>               | Connects every grid-cell forming a river network from springs to mouth                                                                                         | CaMa-Flood                 | LF-EU maps    |
| <i>Grid-cell area (pixArea)</i>                     | Area of every grid cell                                                                                                                                        | CaMa-Flood                 | LF-EU maps    |
| <i>Grid-cell length</i>                             | Length of every grid cell                                                                                                                                      | Grid-cell area             | LF-EU maps    |
| <i>Upstream area (upArea)</i>                       | Accumulated area of all connected grid-cells of the LDD from springs to mouth                                                                                  | LDD, pixArea               | LF-EU maps    |
| <i>Standard deviation of elevation</i>              | Amount of elevation variation within a grid-cell                                                                                                               | MERID DEM                  | LF-EU maps    |
| <i>Gradient</i>                                     | Elevation gradient between two connected grid-cells                                                                                                            | MERIT DEM, LDD             | LF-EU maps    |
| <i>Channel bottom width</i>                         | Width of the bottom of the channel                                                                                                                             | CaMa-Flood                 | LF-EU maps    |
| <i>Channel length</i>                               | Length of river channel in each grid-cell                                                                                                                      | CaMa-Flood                 | LF-EU maps    |
| <i>Channel gradient</i>                             | Gradient (slope) of river channel inside a grid-cell                                                                                                           | MERIT DEM, CaMa-Flood, LDD | LF-EU maps    |
| <i>Manning's roughness coefficient for channels</i> | Manning's roughness coefficient of river channel for each grid-cell                                                                                            | MERIT DEM, upArea          | LF-EU maps    |
| <i>Channel mask</i>                                 | Channel presence in the grid-cell indicator                                                                                                                    | Mask                       | HERA          |
| <i>Side slope</i>                                   | Slope of river banks                                                                                                                                           |                            | LF-EU maps    |
| <i>Bankful channel depth</i>                        | Channel depth                                                                                                                                                  | upArea                     | LF-EU maps    |
| <i>Vegetation types and properties</i>              |                                                                                                                                                                |                            |               |
| <i>Crop coefficient for forest</i>                  | Ratio between the potential (reference) evapotranspiration rate, in mm/day, and the potential evaporation rate of forest (averaged by time and ecosystem type) | CGLS-LC100, SPAM, FAO      | LF-EU maps    |
| <i>Crop coefficient for irrigated crops</i>         | Ratio between the potential (reference) evapotranspiration rate, in mm/day, and the potential                                                                  | CGLS-LC100,                | LF-EU maps    |

|                                                                      |                                                                                                                                                                          |                                 |            |
|----------------------------------------------------------------------|--------------------------------------------------------------------------------------------------------------------------------------------------------------------------|---------------------------------|------------|
|                                                                      | evaporation rate of irrigated crops (averaged by time and ecosystem type)                                                                                                | SPAM,<br>FAO                    |            |
| <i>Crop coefficient for other cover type</i>                         | Ratio between the potential (reference) evapotranspiration rate, in mm/day, and the potential evaporation rate of other cover type (averaged by time and ecosystem type) | CGLS-<br>LC100,<br>SPAM,<br>FAO | LF-EU maps |
| <i>Crop group number for forest</i>                                  | Represents a vegetation type and is an indicator of its adaptation to dry climate (forest)                                                                               | CGLS-<br>LC100,<br>SPAM,<br>FAO | LF-EU maps |
| <i>Crop group number for irrigated crops</i>                         | Represents a vegetation type and is an indicator of its adaptation to dry climate (irrigated crops)                                                                      | CGLS-<br>LC100,<br>SPAM,<br>FAO | LF-EU maps |
| <i>Crop group number for other cover type</i>                        | Represents a vegetation type and is an indicator of its adaptation to dry climate (other)                                                                                | CGLS-<br>LC100,<br>SPAM,<br>FAO | LF-EU maps |
| <i>Manning's surface roughness coefficient for forest</i>            | Roughness or friction applied to the flow by the surface on which water is flowing (forest)                                                                              | CGLS-<br>LC100,<br>SPAM,<br>FAO | LF-EU maps |
| <i>Manning's surface roughness coefficient for irrigated crop</i>    | Roughness or friction applied to the flow by the surface on which water is flowing (irrigated crops)                                                                     | CGLS-<br>LC100,<br>SPAM,<br>FAO | LF-EU maps |
| <i>Manning's surface roughness coefficient for other cover types</i> | Roughness or friction applied to the flow by the surface on which water is flowing (other)                                                                               | CGLS-<br>LC100,<br>SPAM,<br>FAO | LF-EU maps |
| <i>Leaf area index for forest</i>                                    | Defined as half the total area of green elements of the canopy per unit horizontal ground area m <sup>2</sup> /m <sup>2</sup> (10-day average; 36 fields in total)       | CGLS-LAI                        | LF-EU maps |
| <i>Leaf area index for irrigated crop</i>                            | Defined as half the total area of green elements of the canopy per unit horizontal ground area m <sup>2</sup> /m <sup>2</sup> (10-day average; 36 fields in total)       | CGLS-LAI                        | LF-EU maps |
| <i>Leaf area index for other cover types</i>                         | Defined as half the total area of green elements of the canopy per unit horizontal ground area m <sup>2</sup> /m <sup>2</sup> (10-day average; 36 fields in total)       | CGLS-LAI                        | LF-EU maps |
| <i>Rice planting day 1</i>                                           | Most probable day of the year when rice is planted for the                                                                                                               | RiceAtlas                       | LF-EU maps |

|                                                                       |                                                                                         |           |            |
|-----------------------------------------------------------------------|-----------------------------------------------------------------------------------------|-----------|------------|
|                                                                       | first time                                                                              |           |            |
| <i>Rice planting day 2</i>                                            | Most probable day of the year when rice is planted for the second time                  | RiceAtlas | LF-EU maps |
| <i>Rice planting day 3</i>                                            | Most probable day of the year when rice is planted for the third time                   | RiceAtlas | LF-EU maps |
| <i>Rice harvesting day 1</i>                                          | Most probable day of the year when rice is harvested after planting for the first time  | RiceAtlas | LF-EU maps |
| <i>Rice harvesting day 2</i>                                          | Most probable day of the year when rice is harvested after planting for the second time | RiceAtlas | LF-EU maps |
| <i>Rice harvesting day 3</i>                                          | Most probable day of the year when rice is harvested after planting for the third time  | RiceAtlas | LF-EU maps |
| <b><i>Soil properties</i></b>                                         |                                                                                         |           |            |
| <i>Soil depth layer 1 for forest</i>                                  | Forest soil depth for surface soil [layer 1]                                            | SoilGrids | LF-EU maps |
| <i>Soil depth layer 1 for other</i>                                   | Other soil depth for surface soil [layer 1]                                             | SoilGrids | LF-EU maps |
| <i>Soil depth layer 2 for forest</i>                                  | Forest soil depths for middle soil [layer 2]                                            | SoilGrids | LF-EU maps |
| <i>Soil depth layer 2 for other</i>                                   | Other soil depths for middle soil [layer 2]                                             | SoilGrids | LF-EU maps |
| <i>Soil depth layer 3 for forest</i>                                  | Forest soil depths for subsoil [layer 3]                                                | SoilGrids | LF-EU maps |
| <i>Soil depth layer 3 for other</i>                                   | Other soil depths for subsoil [layer 3]                                                 | SoilGrids | LF-EU maps |
| <i>Saturated volumetric soil moisture content layers 1 for forest</i> | Maximum water content in surface soil for forest                                        | SoilGrids | LF-EU maps |
| <i>Saturated volumetric soil moisture content layers 1 for other</i>  | Maximum water content in surface soil for other                                         | SoilGrids | LF-EU maps |
| <i>Saturated volumetric soil moisture content layers 2 for forest</i> | Maximum water content in middle soil for forest                                         | SoilGrids | LF-EU maps |
| <i>Saturated volumetric soil moisture content layers 2 for other</i>  | Maximum water content in middle soil for other                                          | SoilGrids | LF-EU maps |
| <i>Saturated volumetric soil moisture content layers 3</i>            | Maximum water content in subsoil                                                        | SoilGrids | LF-EU maps |

|                                                            |                                                                                                  |           |            |
|------------------------------------------------------------|--------------------------------------------------------------------------------------------------|-----------|------------|
| <i>Residual volumetric soil moisture content layer 1</i>   | Minimum water content in the surface soil                                                        | SoilGrids | LF-EU maps |
| <i>Residual volumetric soil moisture content layer 2</i>   | Minimum water content in the middle soil                                                         | SoilGrids | LF-EU maps |
| <i>Residual volumetric soil moisture content layer 3</i>   | Minimum water content in the subsoil                                                             | SoilGrids | LF-EU maps |
| <i>Pore size index layer 1 for forest</i>                  | pore size index of the surface soil for forest                                                   | SoilGrids | LF-EU maps |
| <i>Pore size index layer 1 for other</i>                   | Van Genuchten parameter $\lambda$ representing the pore size index of the surface soil for other | SoilGrids | LF-EU maps |
| <i>Pore size index layer 2 for forest</i>                  | Van Genuchten parameter $\lambda$ representing the pore size index of the middle soil for forest | SoilGrids | LF-EU maps |
| <i>Pore size index layer 2 for other</i>                   | Van Genuchten parameter $\lambda$ representing the pore size index of the middle soil for other  | SoilGrids | LF-EU maps |
| <i>Pore size index layer 3</i>                             | Van Genuchten parameter $\lambda$ representing the pore size index of the subsoil                | SoilGrids | LF-EU maps |
| <i>Van Genuchten equation parameter layer 1 for forest</i> | Van Genuchten parameter $\alpha$ of the surface soil for forest                                  | SoilGrids | LF-EU maps |
| <i>Van Genuchten equation parameter layer 1 for other</i>  | Van Genuchten parameter $\alpha$ of the surface soil for other                                   | SoilGrids | LF-EU maps |
| <i>Van Genuchten equation parameter layer 2 for forest</i> | Van Genuchten parameter $\alpha$ of the middle soil for forest                                   | SoilGrids | LF-EU maps |
| <i>Van Genuchten equation parameter layer 2 for other</i>  | Van Genuchten parameter $\alpha$ of the middle soil for other                                    | SoilGrids | LF-EU maps |
| <i>Van Genuchten equation parameter layer 3</i>            | Van Genuchten parameter $\alpha$ of the subsoil                                                  | SoilGrids | LF-EU maps |
| <i>Saturated soil conductivity for layer 1 forest</i>      | Ease with which water moves through pore spaces of the surface soil for forest                   | SoilGrids | LF-EU maps |
| <i>Saturated soil conductivity for layer 1 other</i>       | Ease with which water moves through pore spaces of the surface soil for other                    | SoilGrids | LF-EU maps |

|                                              |                                                                               |           |            |
|----------------------------------------------|-------------------------------------------------------------------------------|-----------|------------|
| <i>1 other</i>                               |                                                                               |           |            |
| <i>Saturated soil conductivity for layer</i> | Ease with which water moves through pore spaces of the middle soil for forest | SoilGrids | LF-EU maps |
| <i>2 forest</i>                              |                                                                               |           |            |
| <i>Saturated soil conductivity for layer</i> | Ease with which water moves through pore spaces of the middle soil for other  | SoilGrids | LF-EU maps |
| <i>2 other</i>                               |                                                                               |           |            |
| <i>Saturated soil conductivity for layer</i> | Ease with which water moves through pore spaces of the subsoil                | SoilGrids | LF-EU maps |
| 3                                            |                                                                               |           |            |

| <b><i>Land use</i></b>                     |                                                                                                                                                                                                   |                           |                         |
|--------------------------------------------|---------------------------------------------------------------------------------------------------------------------------------------------------------------------------------------------------|---------------------------|-------------------------|
| <i>Forest surface fraction</i>             | Evergreen and deciduous needle leaf and broad leaf tree areas                                                                                                                                     | CGLS-LC100, HANZE,        | HERA/socioeconomic_maps |
| <i>Sealed surface fraction</i>             | Urban areas, characterizing the human impact on the environment                                                                                                                                   | CGLS-LC100, HANZE,        | HERA/socioeconomic_maps |
| <i>Irrigated surface fraction</i>          | Irrigated areas of all possible crops excluding rice                                                                                                                                              | CLC2018, HANZE            | HERA/socioeconomic_maps |
| <i>Inland water fraction</i>               | Rivers, freshwater and saline lakes, ponds and other permanent water bodies over the continents                                                                                                   | CGLS-LC100, HANZE         | HERA/socioeconomic_maps |
| <i>Irrigated rice fraction</i>             | Irrigated areas of rice                                                                                                                                                                           | CLC2018, SPAM, HANZE      | HERA/socioeconomic_maps |
| <i>Other land cover fraction</i>           | Agricultural areas, non-forested natural area, pervious surface of urban areas                                                                                                                    |                           | HERA/socioeconomic_maps |
| <b><i>Water demand</i></b>                 |                                                                                                                                                                                                   |                           |                         |
| <i>Water demand for domestic use</i>       | Daily supply of water volume for indoor and outdoor household purposes and for all the uses that are connected to the municipal system (e.g., water used by shops, schools, and public buildings) | GHS-POP, AQUASTA T, MSWX  | HERA/water_demand       |
| <i>Water demand for industrial use</i>     | Daily supply of water volume for fabricating, processing, washing and sanitation, cooling or transporting a product, incorporating water into a product                                           | GHS-POP, AQUASTA T, GCAM  | HERA/water_demand       |
| <i>Water demand for thermoelectric use</i> | Daily supply of water volume for the cooling of thermoelectric and nuclear power plant                                                                                                            | GHS-POP, AQUASTA T, GCAM, | HERA/water_demand       |

|                                       |                                                       |                             |                       |
|---------------------------------------|-------------------------------------------------------|-----------------------------|-----------------------|
|                                       |                                                       | MSWX                        |                       |
| <i>Water demand for livestock use</i> | Daily supply of water volume for domestic animal need | AQUASTA<br>T, GCAM,<br>GLW3 | HERA/water_d<br>emand |
| <b><i>Lakes and reservoirs</i></b>    |                                                       |                             |                       |
| <i>Lake mask</i>                      | Area covered by lakes only (binary representation)    | GLWD                        | LF-EU maps            |
| <i>Reservoir map</i>                  | Location and identifier of each reservoir             | EFAS,<br>HANZE,<br>Grand    | HERA/reservoirs       |



**Table S3: Main datasets used in the creation of surface fields inputs for LISFLOOD model. For more information on the generation of surface fields, the author can refer to Choulga et al. (2023).**

| <b>Dataset name</b> | <b>Description</b>                                                                                                                                                                                                                                                              | <b>Data source</b>                                                                                                                                                  |
|---------------------|---------------------------------------------------------------------------------------------------------------------------------------------------------------------------------------------------------------------------------------------------------------------------------|---------------------------------------------------------------------------------------------------------------------------------------------------------------------|
| <b>AQUASTAT</b>     | <i>FAO's global information system on water resources and agricultural water management.</i>                                                                                                                                                                                    | <a href="https://www.fao.org/land-water/databases-and-software/aquastat/en/">https://www.fao.org/land-water/databases-and-software/aquastat/en/</a>                 |
| <b>CaMa-Flood</b>   | <i>The Catchment-based Macro-scale Floodplain (CaMa-Flood) Global River Hydrodynamics Model v4.0 265 maps (CaMa-Flood) is a global hydrography dataset.</i>                                                                                                                     | <a href="http://hydro.iis.u-tokyo.ac.jp/~yamada/cama-flood/">http://hydro.iis.u-tokyo.ac.jp/~yamada/cama-flood/</a>                                                 |
| <b>CGLS-LAI</b>     | <i>The Copernicus Global Land Service (CGLS) Leaf Area Index (LAI) 1km Version 2 collection (CGLS-LAI) is a set of global maps data describing vegetation dynamics – the annual evolution of LAI at 10-day intervals over the period of 1999-2020.</i>                          | <a href="https://land.copernicus.eu/global/products/lai">https://land.copernicus.eu/global/products/lai</a>                                                         |
| <b>CGLS-LC100</b>   | <i>The Copernicus Global Land Service Land Cover (LC) 100m map (CGLS-LC100) 283 is a global land cover map of the year 2015.</i>                                                                                                                                                | <a href="https://land.copernicus.eu/global/products/lc">https://land.copernicus.eu/global/products/lc</a>                                                           |
| <b>CLC2018</b>      | <i>The Coordination of Information on the Environment (CORINE) Land Cover (CLC) inventory for 2018 (CLC2018) is a set of maps describing the land cover/ land use status of 2018 covering 39 countries in Europe.</i>                                                           | <a href="https://land.copernicus.eu/en/products/corine-land-cover/clc2018">https://land.copernicus.eu/en/products/corine-land-cover/clc2018</a>                     |
| <b>FAO</b>          | <i>The FAO Irrigation and Drainage Paper No. 56 (FAO) is a publication covering geographically referenced statistics for crop development stages, crop coefficients, crop height, rooting depth, and soil water depletion fraction for common crops found across the world.</i> | <a href="https://www.fao.org/land-water/databases-and-software/crop-information/en/">https://www.fao.org/land-water/databases-and-software/crop-information/en/</a> |
| <b>GCAM</b>         | <i>Global Change Analysis Model (GCAM) is an integrated, multi-sector model developed by the Joint Global Change Research Institute (JGCRI) to explore the overall behaviour of human and physical systems dynamics and interactions.</i>                                       | <a href="https://github.com/JGCRI/gcam-core">https://github.com/JGCRI/gcam-core</a>                                                                                 |
| <b>GHS-POP</b>      | <i>The Global Human Settlement Population Grid multitemporal version R2019A (GHS POP) is a spatial raster dataset that depicts the distribution of population, expressed as the number of people per grid-cell.</i>                                                             | <a href="https://ghsl.jrc.ec.europa.eu/ghs_pop2019.php">https://ghsl.jrc.ec.europa.eu/ghs_pop2019.php</a>                                                           |
| <b>GLWD</b>         | <i>The Global Lakes and Wetlands Database (GLWD) is a global database of water bodies.</i>                                                                                                                                                                                      | <a href="https://www.worldwildlife.org/pages/global-lakes-and-wetlands-database">https://www.worldwildlife.org/pages/global-lakes-and-wetlands-database</a>         |
| <b>GRanD</b>        | <i>The Global Reservoir and Dam Database (GRanD) is a product of the Global Water System Project. It collates existing dam and reservoir datasets with the aim of providing a single,</i>                                                                                       | <a href="https://www.globaldamwatch.org/directory">https://www.globaldamwatch.org/directory</a>                                                                     |

---

|                  |                                                                                                                                                                                                                                                                                               |                                                                                                                                                                               |
|------------------|-----------------------------------------------------------------------------------------------------------------------------------------------------------------------------------------------------------------------------------------------------------------------------------------------|-------------------------------------------------------------------------------------------------------------------------------------------------------------------------------|
|                  | <i>geographically explicit and reliable database for the scientific community.</i>                                                                                                                                                                                                            |                                                                                                                                                                               |
| <b>HANZE</b>     | <i>The Historical Analysis of Natural Hazards in Europe (HANZE) is a pan-European database of exposure to natural hazards and damaging historical floods since 1870.</i>                                                                                                                      | <a href="https://data.4tu.nl/collections/_/5065346/1">https://data.4tu.nl/collections/_/5065346/1</a>                                                                         |
| <b>MERIT DEM</b> | <i>Multi-Error-Removed Improved-Terrain Digital Elevation Model v.1.0.3 (MERIT DEM) is a high accuracy global DEM at 3 arc second resolution (~90 m at the Equator).</i>                                                                                                                      | <a href="http://hydro.iis.u-tokyo.ac.jp/~yamada/MERIT_DEM/">http://hydro.iis.u-tokyo.ac.jp/~yamada/MERIT_DEM/</a>                                                             |
| <b>MSWX</b>      | <i>Multi-Source Weather (MSWX) is a high-resolution (3-hourly, 0.1°), bias-corrected meteorological product with global coverage from 1979 to present.</i>                                                                                                                                    | <a href="https://www.gloh2o.org/mswx/">https://www.gloh2o.org/mswx/</a>                                                                                                       |
| <b>RiceAtlas</b> | <i>The RiceAtlas v3 (RiceAtlas) is a spatial database of global rice calendars and production.</i>                                                                                                                                                                                            | <a href="https://dataverse.harvard.edu/dataset.xhtml?persistentId=doi:10.7910/DVN/JE6R2R">https://dataverse.harvard.edu/dataset.xhtml?persistentId=doi:10.7910/DVN/JE6R2R</a> |
| <b>SPAM</b>      | <i>The Spatial Production Allocation Model (SPAM) – Global Spatially-Disaggregated Crop Production Statistics Data for 2010 v2.0 (SPAM2010) is a global dataset which redistributes crop production information from country and sub-national provinces level to a finer grid-cell level.</i> | <a href="https://mapspam.info/d/ata/">https://mapspam.info/d/ata/</a>                                                                                                         |
| <b>SoilGrids</b> | <i>The International Soil Reference and Information Centre (ISRIC) SoilGrids250m global gridded soil information release 2017 (fSoilGrids) is a set of global soil property and class maps at 250 m resolution.</i>                                                                           | <a href="https://www.isric.org/explore/soilgrids/faq-soilgrids-2017">https://www.isric.org/explore/soilgrids/faq-soilgrids-2017</a>                                           |

---

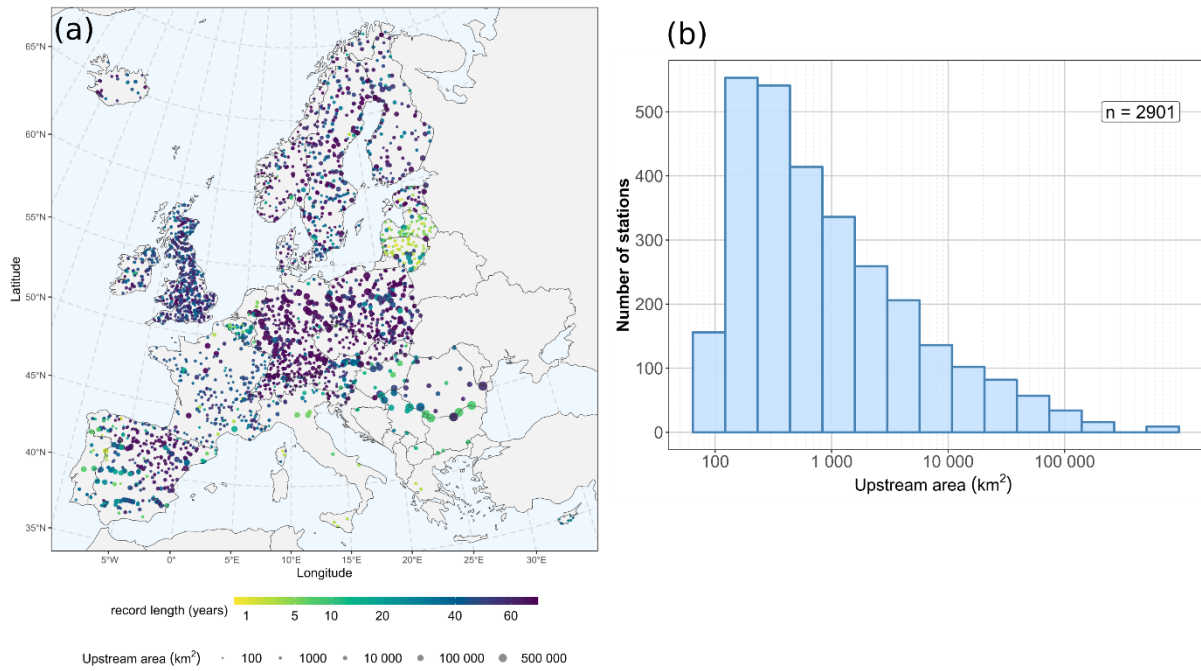

**Figure S2: Metadata of the 2901 river gauging stations used in the validation of HERA. It shows (a) the location, upstream area and record length associated to each stations and (b) the distribution of upstream area of the selected river gauging stations.**

## References

LISFLOOD static and parameter maps for Europe: <http://data.europa.eu/89h/f572c443-7466-4adf-87aa-c0847a169f23>, last access: 11 January 2024.

CEMS-Flood online documentation: <https://confluence.ecmwf.int/display/CEMS/CEMS-Flood>, last access: 14 December 2023.
